# Supplementary material for: Separation of Cd(ii) and Ni(ii) in a binary mixture through competitive adsorption and acid leaching
Source: Royal Society of Chemistry journal article supplement (doi:10.1039/c5ra13789f), 2015-01-01
Supplement: c5ra13789f1.pdf [file c5ra13789f1.pdf]

## **Separation Cd(II) and Ni(II) in binary solution by competitive adsorption combining with acid leaching experiments**

Hong Guo <sup>a,b</sup>, Shufen Zhang <sup>a,\*</sup>, Zinong Kou <sup>c</sup>, Shangru Zhai <sup>b</sup>, Wei Ma <sup>a</sup>, Yi Yang <sup>b</sup> and Yin Huang<sup>d</sup>

<sup>a</sup> *State Key Lab of Fine Chemicals, Dalian University of Technology, Dalian 116024, China*

<sup>b</sup> *Faculty of Light Industry and Chemical Engineering, Dalian Polytechnic University, Dalian 116034, China*

<sup>c</sup> *Instrument Analysis Centre, Dalian Polytechnic University, Dalian 116034, China*

<sup>d</sup> *School of Textile and Material Engineering, Dalian Polytechnic University, Dalian 116034, China*

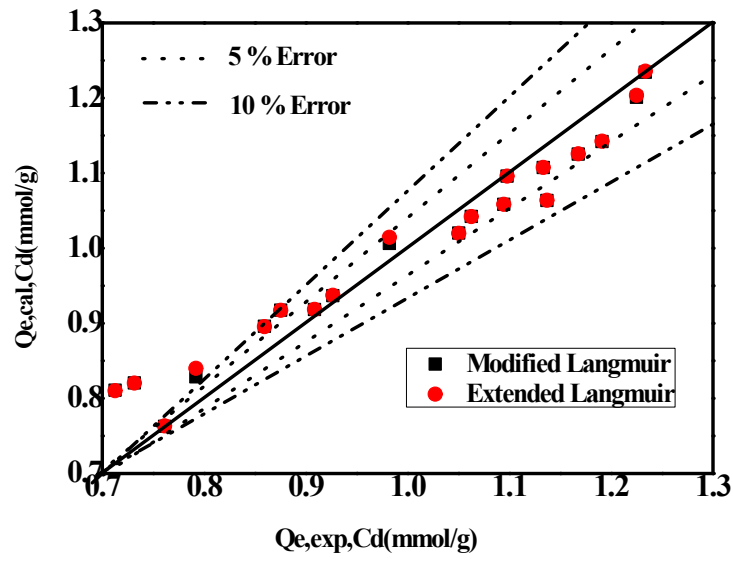

**Fig.S1.** Comparison of the experimental and calculated  $Q_e$  values of cadmium(II) ions in a binary mixture of Cadmium(II) and Nickel(II) ions

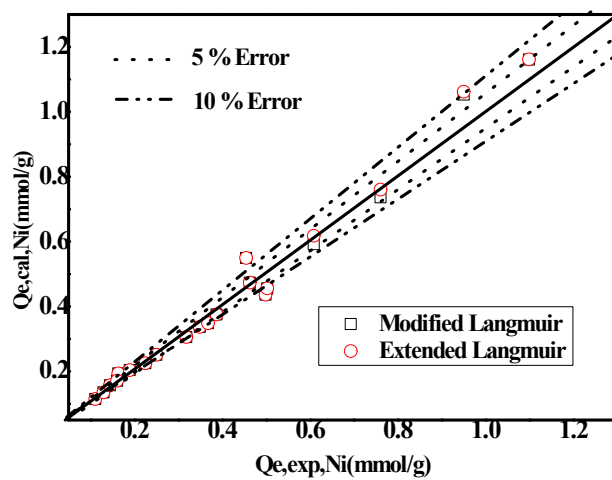

**Fig.S2.** Comparison of the experimental and calculated  $Q_e$  values of nickel (II) ions in a binary mixture of cadmium(II) and nickel(II) ions

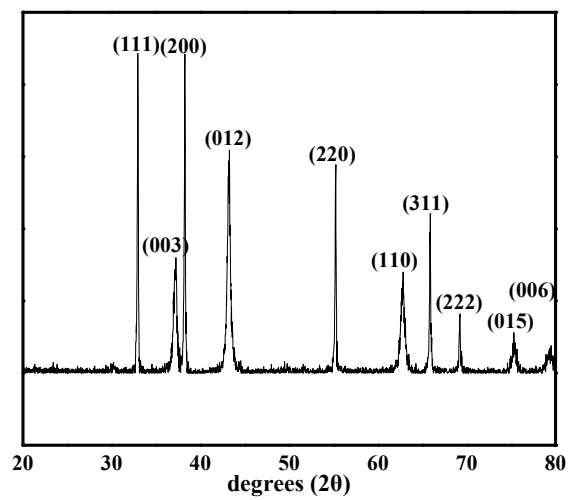

**Fig.S3** The powder X-ray diffraction patterns of the mixture of the oxides of Cd(II) and Ni(II)

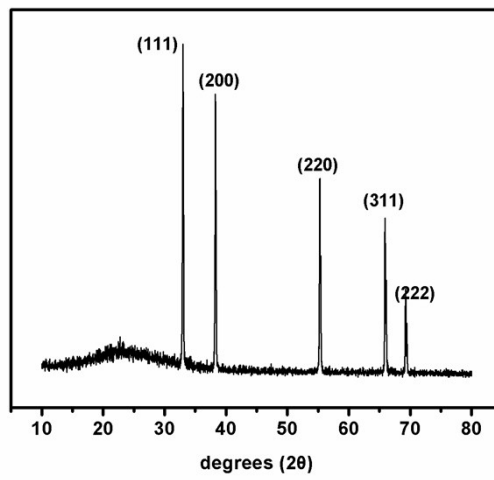

**Fig. S4.** The powder X-ray diffraction patterns of recovered cadmium oxide

**Table S1** Adsorption isotherm parameters for Cd(II) and Ni(II) onto NaS-MS in single-component system (original pH 6.0, adsorbent dose = 1 g L<sup>-1</sup>, T=303 K, t=1.5 h)

| Component | Langmuir              |                   |       | Freundlich                                   |      |       |
|-----------|-----------------------|-------------------|-------|----------------------------------------------|------|-------|
|           | $Q_{max}$<br>(mmol/g) | $K_L$<br>(L/mmol) | $R^2$ | $K_F[(\text{mmol/g})(\text{L /mmol})^{1/n}]$ | $n$  | $R^2$ |
| Cd(II)    | 1.25                  | 216.05            | 0.99  | 1.64                                         | 6.17 | 0.81  |
| Ni(II)    | 1.18                  | 566.67            | 0.99  | 1.83                                         | 3.51 | 0.79  |

**Table S2** Summary of the concentration of heavy metals during the separation process and the recovery of Cd(II)(Original pH 4.0~6.0, adsorbent dose = 0.6 g L<sup>-1</sup>, T=303 K, t=1.5 h)

| Initial concentration |           | Molar ratio       | Filtrate I |          | Filtrate II |          | Filtrate III |          | Light green solution |          | Filtrate IV |          | Recovery of Cd(II) |
|-----------------------|-----------|-------------------|------------|----------|-------------|----------|--------------|----------|----------------------|----------|-------------|----------|--------------------|
| $C_{0Cd}$             | $C_{0Ni}$ | $C_{0Cd}/C_{0Ni}$ | $C_{Cd}$   | $C_{Ni}$ | $C_{Cd}$    | $C_{Ni}$ | $C_{Cd}$     | $C_{Ni}$ | $C_{Cd}$             | $C_{Ni}$ | $C_{Cd}$    | $C_{Ni}$ |                    |
| (mg/L)                | (mg/L)    | $C_{0Ni}$         | (mg/L)     | (mg/L)   | (mg/L)      | (mg/L)   | (mg/L)       | (mg/L)   | (mg/L)               | (mg/L)   | (mg/L)      | (mg/L)   |                    |
| 1093.24               | 526.30    | 1.08/1            | 595.58     | 439.91   | 314.2       | 2.92     | 1.36         | 2.92     | 18.22                | 58.91    | 6.18        | 45.90    | 83 %               |
| 2186.50               | 526.30    | 2.16/1            | 1023.59    | 416.60   | 919.92      | 4.88     | 8.43         | 4.88     | 9.65                 | 34.88    | 1.42        | 23.98    | 98.4 %             |
| 1093.24               | 1052.6    | 1/1.84            | 720.48     | 912.83   | 362.04      | 12.14    | 5.48         | 12.14    | 25.73                | 113.37   | 0.62        | 89.72    | 97 %               |
| 1093.24               | 1578.9    | 1/2.77            | 876.77     | 1392.44  | 274.34      | 10.33    | 3.30         | 10.33    | 13.77                | 180.54   | 0.31        | 154.1    | 94 %               |
| 1093.24               | 2105.2    | 1/3.69            | 873.15     | 1594.47  | 268.36      | 22.6     | 3.23         | 22.6     | 16.76                | 156.94   | 0.33        | 145.1    | 96 %               |
